1           **Genomic data enables genetic evaluation using data**  
2                               **recorded on LMIC smallholder dairy farms**

3           *Owen Powell*<sup>1</sup>, *Raphael Mrode*<sup>2,3</sup>, *R. Chris Gaynor*<sup>1</sup>, *Martin Johnsson*<sup>1,4</sup>, *Gregor Gorjanc*<sup>1</sup>,

4                                                       & *John M. Hickey*<sup>1</sup>

5           <sup>1</sup>*The Roslin Institute and Royal (Dick) School of Veterinary Studies, University of Edinburgh,*  
6           *Easter Bush, Midlothian, EH25 9RG, UK.*

7           <sup>2</sup>*Scotland's Rural College (SRUC), Easter Bush, Midlothian, EH25 9RG, UK.*

8           <sup>3</sup>*International Livestock Research Institute (ILRI), Nairobi 00100, Kenya.*

9           <sup>4</sup>*Department of Animal Breeding and Genetics, Swedish University of Agricultural Sciences,*  
10           *Box 7023, 750 07, Uppsala, Sweden*

11

12

## 13 **Abstract**

14 **Background:** Genetic evaluation is a central component of a breeding program. In advanced  
15 economies, most genetic evaluations depend on large quantities of data that are recorded on  
16 commercial farms. Large herd sizes and widespread use of artificial insemination create strong  
17 genetic connectedness that enables the genetic and environmental effects of an individual  
18 animal's phenotype to be accurately separated. In contrast to this, herds are neither large nor  
19 have strong genetic connectedness in smallholder dairy production systems of many low to  
20 middle-income countries (LMIC). This limits genetic evaluation, and furthermore, the pedigree  
21 information needed for traditional genetic evaluation is typically unavailable. Genomic  
22 information keeps track of shared haplotypes rather than shared relatives. This information  
23 could capture and strengthen genetic connectedness between herds and through this may enable  
24 genetic evaluations for LMIC smallholder dairy farms. The objective of this study was to use  
25 simulation to quantify the power of genomic information to enable genetic evaluation under  
26 such conditions.

27 **Results:** The results from this study show: (i) the genetic evaluation of phenotyped cows using  
28 genomic information had higher accuracy compared to pedigree information across all  
29 breeding designs; (ii) the genetic evaluation of phenotyped cows with genomic information  
30 and modelling herd as a random effect had higher or equal accuracy compared to modelling  
31 herd as a fixed effect; (iii) the genetic evaluation of phenotyped cows from breeding designs  
32 with strong genetic connectedness had higher accuracy compared to breeding designs with  
33 weaker genetic connectedness; (iv) genomic prediction of young bulls was possible using  
34 marker estimates from the genetic evaluations of their phenotyped dams. For example, the  
35 accuracy of genomic prediction of young bulls from an average herd size of 1 ( $\mu=1.58$ ) was  
36 0.40 under a breeding design with 1,000 sires mated per generation and a training set of 8,000  
37 phenotyped and genotyped cows.

38 **Conclusions:** This study demonstrates the potential of genomic information to be an enabling  
39 technology in LMIC smallholder dairy production systems by facilitating genetic evaluations  
40 with *in-situ* records collected from farms with herd sizes of four cows or less. Across a range  
41 of breeding designs, genomic data enabled accurate genetic evaluation of phenotyped cows and  
42 genomic prediction of young bulls using data sets that contained small herds with weak genetic  
43 connections. The use of smallholder dairy data in genetic evaluations would enable the  
44 establishment of breeding programs to improve *in-situ* germplasm and, if required, would  
45 enable the importation of the most suitable external germplasm. This could be individually  
46 tailored for each target environment. Together this would increase the productivity,  
47 profitability and sustainability of LMIC smallholder dairy production systems. However, data  
48 collection, including genomic data, is expensive and business models will need to be carefully  
49 constructed so that the costs are sustainably offset.

## 50 **Background**

51           The huge increase in milk yield of dairy cattle in advanced economies over the past  
52 century is a powerful example of the impact that selective breeding can have on improving  
53 livestock productivity. For example, in the US dairy industry, production of milk per cow  
54 doubled from an average of 20 litres to 40 litres per day between 1960 and 2000 [1].  
55 Approximately 50% of this improvement can be attributed to breeding. However, despite the  
56 potential benefits, similar breeding practices have had poor efficacy and adoption in  
57 smallholder dairy production systems in many low to middle-income countries (LMICs).  
58 Recent estimates from Kenyan smallholder farms suggest that average productivity per cow is  
59 approximately 5 litres per day and there is little evidence of major genetic improvement in  
60 recent decades [2–5].

61           In Kenya and other East African countries, farms with five cows or less account for  
62 more than 70% of milk production [6,7], and farms with 10 cows or less account for around  
63 90% of milk production [8]. The low levels of productivity and its economic importance has  
64 stimulated renewed efforts to improve dairy cow productivity in LMIC smallholder dairy  
65 production systems [6,9–11]. These efforts include new approaches for collecting data from  
66 rural farms more effectively and the establishment of effective and penetrant genetic evaluation  
67 schemes [10,12–14], breeding programs and dissemination programs [15], all of which have  
68 been somewhat intractable to sustain over the long-term in the past.

69           Genetic evaluation is a central component of a breeding program. The properties of an  
70 ideal data set that enables an accurate genetic evaluation include: (i) genetic connectedness  
71 between herds or management groups [16]; (ii) sufficient numbers of animals; (iii) sufficiently  
72 large herd sizes; and (iv) accurate phenotype collection. Genetic evaluations have been very  
73 successful in advanced economies because large data sets are routinely assembled from

74 commercial farms with modest to large herd sizes (e.g., twenty to several thousand cows).  
75 Genetic connectedness between herds is high due to the widespread use of artificial  
76 insemination (AI). Typically, phenotypes are accurately measured (e.g., automatically on  
77 advanced milking machines). Such data enables the genetic and environmental effects of an  
78 individual animal's phenotype to be accurately separated. All or many of these features are not  
79 present in many LMIC smallholder dairy production systems. For example, smallholder dairy  
80 farmers in East Africa have small herd sizes (e.g., herds with one to five cows), a low  
81 prevalence of AI (5-10%) [8], and an absence of automated phenotyping systems [17].  
82 Traditionally, this has prevented the establishment of effective genetic evaluation systems in  
83 these settings.

84 Genomic evaluations use a genomic relationship matrix to capture the realised, rather  
85 than expected pedigree-derived relationships between animals [18,19]. The use of genomic  
86 information has been transformative for many genetic evaluation systems in advanced  
87 economies. For example, the accuracy, which is the square root of reliability, of prediction for  
88 milk yield of young bulls increased from 0.62 using pedigree best linear unbiased prediction  
89 (PBLUP) to 0.85 for genomic best linear unbiased prediction (GBLUP) [20]. In the context of  
90 LMIC smallholder dairy production systems, genomic data could be even more important than  
91 it has been in advanced economies. For the first time, genomic data could enable effective  
92 genetic evaluation systems based on relatively imprecisely measured phenotypes, collected on  
93 cows in very small herd sizes, which have relatively low levels of genetic connectedness. In  
94 such a setting, genomic data could capture and utilise information pertaining to haplotypes that  
95 are shared by animals in different herds. This information could reveal genetic connectedness  
96 that is unseen by pedigree information, which would, in turn, enable more accurate partitioning  
97 of the genetic and environmental effects on animal's performance in small herds. This opens  
98 up the possibility of an *in-situ* breeding program based on *in-situ* performance data from LMIC

99 smallholder dairy farms. Given that such data reflects the performance of animals within the  
100 target management and environment settings, animals produced by such a breeding program  
101 would be most suited to the participating smallholder dairy farmers.

102 In genetic evaluations, the herd or management group is usually included in the  
103 statistical model to enhance the separation of the genetic and environmental effects of an  
104 animal's performance [21–24]. Herds can be modelled as fixed or random effects. Most genetic  
105 evaluations in advanced economies model herds as fixed effects because herd sizes are  
106 typically large, which leads to fixed and random effects models giving almost equal solutions  
107 [22,23]. When herd sizes are small, such as in many LMIC smallholder dairy production  
108 systems, modelling herd as a fixed effect leads to inaccurate solutions [25]. Modelling small  
109 herds as random effects may reduce this inaccuracy, providing estimated breeding values  
110 (EBVs) with higher accuracies. In combination with the use of genomic information, this could  
111 enable genetic evaluations to be performed using data recorded, *in-situ*, on LMIC smallholder  
112 dairy farms.

113 The aims of this study were to use simulation to quantify: (i) the power of genomic  
114 information to enable genetic evaluation based on phenotypes recorded on smallholder dairy  
115 farms and, under such conditions, the impact of: (ii) modelling herd as a fixed or random effect;  
116 (iii) the genetic connectedness of a breeding population; and (iv) the number of records on the  
117 accuracy of EBVs of phenotyped cows and young bulls.

118 Across a range of breeding designs, genomic data enabled accurate genetic evaluation  
119 of phenotyped cows using data sets that contained small herds with weak genetic connections  
120 (according to pedigree). The genetic evaluation of phenotyped cows using genomic  
121 information had higher accuracy compared to pedigree information across all breeding designs.  
122 The genetic evaluation of phenotyped cows with genomic information and modelling herd as

123 a random effect had higher or equal accuracy compared to modelling herd as a fixed effect.  
124 The genetic evaluation of phenotyped cows from breeding designs with strong genetic  
125 connectedness had higher accuracy compared to breeding designs with weaker genetic  
126 connectedness. The genomic prediction of young bulls was possible using marker estimates  
127 from the genetic evaluations of their phenotyped dams. For example, the accuracy of genomic  
128 prediction of young bulls from an average herd size of 1 ( $\mu=1.58$ ) was 0.40 under a breeding  
129 design with 1,000 sires mated per generation and a training set of 8,000 phenotyped and  
130 genotyped cows. Our results show that genetic evaluations with genomic information can  
131 provide a high accuracy of EBVs of phenotyped cows and young bulls when using data from  
132 smallholder dairy farms, and would, therefore, enable *in-situ* breeding programs based on  
133 performance measured *in-situ*.

134

## 135 **Material and methods**

136 Simulations were used to quantify the power of genomic information to enable genetic  
137 evaluation based on phenotypes recorded on smallholder dairy farms. Ten replicates of several  
138 scenarios were performed with the overall simulation scheme depicted in Figure 1. The  
139 simulations were performed using AlphaSimR [26] and were designed to: (i) generate whole  
140 genome sequence data; (ii) generate single nucleotide polymorphisms (SNP), quantitative trait  
141 loci (QTL) and phenotypes; (iii) generate pedigree structures for LMIC smallholder dairy  
142 populations; (iv) vary the population and average herd size; (v) vary the ratios of genetic, herd  
143 and environmental variances; and (vi) run genetic evaluations modelling herd as either fixed  
144 or random effects. Conceptually, the simulation scheme was divided into historical and  
145 evaluation phases.

146 Each of the 10 replicates consisted of: (i) a burn-in phase shared by all strategies; and  
147 (ii) an evaluation phase that simulated breeding with each of a number of different breeding  
148 designs. Specifically, the historical component was subdivided into three stages: the first  
149 simulated the species' genome sequence; the second simulated founder genotypes for the initial  
150 parents; and the third simulated five generations of breeding using phenotypic selection.

151 The burn-in phase represented historical evolution, under the assumption that livestock  
152 populations have been evolving for tens of thousands of years, and historical breeding efforts  
153 that were represented by five generations of phenotypic selection. The evaluation phase  
154 represented six generations of animal breeding in which animals were selected on their  
155 phenotypes. In the evaluation phase, population parameters were varied (i.e., the number of  
156 sires mated per generation, large or small population sizes, large or small average herd sizes,  
157 and different proportions of the genetic, herd and environmental variances) to resemble a range  
158 of possible breeding designs (Figure 1).



## 159 **Burn-In: Generation of whole genome sequence data**

160 For each replicate, a genome consisting of 10 chromosome pairs was simulated for the  
161 hypothetical animal species similar to cattle. Sequence data was generated using the Markovian  
162 Coalescent Simulator (MaCS) [27] and AlphaSimR [26] for 4,000 base haplotypes for each of  
163 ten chromosomes. The chromosomes were each 100 cM in length comprising  $10^8$  base pairs  
164 and were simulated using a per site mutation rate of  $1 \times 10^{-8}$  and a per site recombination rate  
165 of  $1 \times 10^{-8}$ . The  $N_e$  was set to 1,035 in the final generation of historical simulation, to  $N_e=6,000$   
166 (1,000 years ago) to  $N_e=24,000$  (10,000 years ago), and to  $N_e=48,000$  (100,000 years ago) with  
167 linear changes in between [28]. The  $N_e$  of 1,035 was chosen to reflect the high genetic diversity  
168 found in cattle populations in Africa.

## 169 **Burn-In: Founder Genotypes**

170 Simulated genome sequences were used to produce 2,000 founder animals. These  
171 founder animals served as the initial parents in the burn-in phase. Sites segregating in the  
172 founders' sequences were randomly selected to serve as 5,000 SNP markers per chromosome  
173 (50,000 genome-wide in total) and 1,000 QTL per chromosome (10,000 genome-wide in total).

## 174 **Burn-In: Phenotype**

175 A single trait representing total milk yield for a single lactation was simulated for all  
176 animals. The true breeding values (TBVs) were calculated by summing the average effects of  
177 the animal's genotype at each QTL. QTL additive effects were sampled from a standard normal  
178 distribution,  $N(0,1)$ , and linearly scaled to produce TBVs in the founder population with a  
179 variance ( $\sigma_a^2$ ) of 0.2. Random error was sampled from a normal distribution,  $N(0, \sigma_e^2)$ . The  
180 initial random error variance was set at  $\sigma_e^2=1.8$ . The TBVs and random error effects were  
181 summed to create the phenotypes of the animal. These phenotypes were used for selection  
182 during the burn-in and the first 5 years in the evaluation phases of the simulation. Additional

183 herd effects were added to the phenotypes of the animals, described in a later section, in the  
184 final generation of the evaluation phase of the simulation

### 185 **Recent (Burn-In) Breeding**

186 Recent (burn-in) breeding for milk yield was simulated over 5 discrete generations of  
187 selective breeding on phenotype. The features of this breeding stage were: (i) 225 sires per  
188 generation, (ii) 1,000 dams per generation, and (iii) 2,000 offspring per generation. These  
189 numbers were chosen to match the base population  $N_e$  of 1,035 following the equation from  
190 Charlesworth et al. (2008) that accounts for the variable number of males and females as well  
191 as the mean and variance of family size. In the final generation of this stage, 80,000 offspring  
192 were generated to enable the full range of scenarios in the evaluation phase of the simulation.

### 193 **Evaluation Phase**

194 The evaluation phase of the simulation modelled breeding using alternative breeding  
195 designs. Each design was simulated for an additional 6 generations following the recent  
196 breeding burn-in component so that each design could be evaluated with an equivalent starting  
197 point. A baseline design was constructed using parameters that are representative of the current  
198 smallholder farming system commonly observed in East Africa. We refer to this design as the  
199 LMIC design. Alternative breeding designs were modifications that used the LMIC design as  
200 a template (Figure 1). The common features across the simulation of all the breeding designs  
201 were: (i) all generations of selection produced 80,000 animals of equal sex ratio, (ii) for  
202 simplicity selection on sires was based on their phenotype, (iii) no selection was performed on  
203 dams. Alternate breeding designs varied: (i) the size of the training set; (ii) the number of sires  
204 mated per generation; (iii) the average herd size; and (iv) the proportions of genetic, herd and  
205 environmental variances. A schematic for the overall structure of the breeding designs,  
206 including the LMIC design, is given in Figure 1 and a detailed description follows.

## 207 *LMIC Design*

208 The LMIC design was developed to approximate the current smallholder farming  
209 system structure commonly observed in East Africa. The training set size was set at 8,000  
210 phenotyped cows and the number of sires mated per generation was set to 1,000. A trait  
211 heritability of 0.1 and ratio of 1:4 between genetic and herd effect variance ratios were chosen  
212 based upon unpublished data [29].

## 213 **Genetic Evaluation Models**

214 Breeding values were estimated using the following basic model:

$$215 \quad \mathbf{y} = \mathbf{X}\mathbf{b} + \mathbf{Z}\mathbf{u} + \mathbf{e}, \quad (1)$$

216 where  $\mathbf{y}$  is a vector of phenotype records measured on cows;  $\mathbf{b}$  is a vector of fixed effects;  $\mathbf{u}$  is  
217 a vector of breeding values for which we assumed that with the PBLUP  $\mathbf{u} \sim N(0, \mathbf{A}\sigma_a^2)$  and  
218 with the GBUP  $\mathbf{u} \sim N(0, \mathbf{G}\sigma_a^2)$ , where  $\mathbf{A}$  is the pedigree numerator relationship matrix based  
219 on 5 generations of the pedigree [30] and  $\mathbf{G}$  is the genomic numerator relationship matrix based  
220 on 50k SNP chip [31];  $\mathbf{e}$  is a vector of residuals for which we assumed  $\mathbf{e} \sim N(0, \mathbf{I}\sigma_e^2)$ ;  $\mathbf{X}$  and  $\mathbf{Z}$   
221 are the incidence matrices linking phenotype records respectively to  $\mathbf{b}$  and  $\mathbf{u}$ . We have  
222 conducted three analyses with the basic model in relation to a herd effect: (i) we excluded it,  
223 which gave us the basic model with intercept as the only fixed effect; (ii) we modelled it as a  
224 fixed effect; and (iii) we modelled it as a random effect for which we assumed  $\mathbf{h} \sim N(0, \mathbf{I}\sigma_h^2)$ .  
225 We assumed that the variance of herd effects  $\sigma_h^2$ , breeding values  $\sigma_a^2$  and residuals  $\sigma_e^2$  were  
226 known and set them to the simulated values of the LMIC design. Only the last generation of  
227 phenotype data was used in model 1 to mimic the recent introduction of phenotype, pedigree  
228 and genomic data recording.

229 PBLUP evaluations were run using the WOMBAT software [32]. GBLUP evaluations  
230 were run using the AlphaBayes software [33]. Three genetic evaluation models were fit: (i)  
231 excluding herd effects; (ii) herds modelled as fixed effects; and (iii) herds modelled as random  
232 effects. All models modelled the animal IDs as random effects. All other parameters were held  
233 constant at the values used in the LMIC design.

#### 234 **Genetic Connectedness and Herd Size**

235 Genetic connectedness was varied across different breeding designs in two ways; (i)  
236 herd connectivity – the distribution of related animals within and across different herds, and  
237 (ii) the recent  $N_e$  of the breeding design. The herd connectivity was varied by simulating  
238 different average herd sizes. To generate datasets with a range of different average herd sizes,  
239 the realised herd sizes were sampled from a Poisson distribution with a lambda of 1 ( $\mu = 1.58$ ,  
240  $\sigma^2 = 0.66$ ), 2 ( $\mu = 2.32$ ,  $\sigma^2 = 1.60$ ), 4 ( $\mu = 4.06$ ,  $\sigma^2 = 3.78$ ), 8 ( $\mu = 8$ ,  $\sigma^2 = 8$ ), 16 ( $\mu = 16$ ,  $\sigma^2 =$   
241 16.19) and 32 ( $\mu = 32$ ,  $\sigma^2 = 31.92$ ). The recent  $N_e$  of the breeding design was varied using four  
242 different numbers of sires mated per generation: 100, 250, 1,000 and 5,000 sires. The number  
243 of dams per generation remained constant at 40,000. All other parameters were held constant  
244 at the values used in the LMIC design.

#### 245 **Size of Training Set**

246 The size of the training set used in the genetic evaluations was varied across different  
247 breeding designs using four different numbers of records: 2,000, 8,000, 16,000 and 32,000  
248 phenotyped cows. Phenotyped cows were sampled evenly across the population, to ensure the  
249 genetic connectedness was maintained. All other parameters were held constant at the values  
250 used in the LMIC design.

## 251 **Trait Heritability and Herd Effect**

252 To produce the final phenotype records, the TBVs were standardized and re-scaled, and  
253 herd and random error effects were sampled from a normal distribution with corresponding  
254 variances. In addition to the LMIC design, which had a trait with a narrow sense heritability of  
255 0.1 and herd effect variance ratio of 0.4, we simulated two other scenarios: (i) a trait with a  
256 narrow sense heritability of 0.3 and herd effect variance ratio of 0.4; and (ii) a trait with a  
257 narrow sense heritability of 0.5 and herd effect variance ratio of 0.4. For each of the three  
258 scenarios, the TBVs, herd effects and random errors were summed to create the final  
259 phenotypes of the cows. All other parameters were held constant at the values used in the LMIC  
260 design.

## 261 **Generation of young bull population**

262 For each scenario we generated an additional generation of offspring to produce a  
263 validation set of 2,000, 8,000, 16,000 and 32,000 selection candidates, the young bulls that  
264 would have been genomically tested. Young bulls had no phenotypes recorded and as such  
265 served as forward validation of the model 1 fitted on phenotyped cows.

## 266 **Comparison of Breeding Designs**

267 The various breeding designs resulted in 288 different scenarios which enabled multiple  
268 comparisons. The breeding designs were compared based upon the accuracy and bias of EBVs  
269 separately for each scenario and replicate – we report mean and 95% interval of estimates over  
270 replicates. Accuracy was measured as the Pearson's correlation coefficient between the EBVs  
271 and TBVs. The bias of genomic prediction was measured as the slope of the regression of the  
272 TBVs on the EBVs.

## 273 **Results**

274           The various breeding designs resulted in 288 different scenarios which enabled multiple  
275 comparisons. Across a range of breeding designs, genomic data enabled accurate genetic  
276 evaluation of phenotyped cows using data sets that contained small herds with weak genetic  
277 connections. The main trends observed in our results show: (i) the genetic evaluation of  
278 phenotyped cows using genomic information had higher accuracy compared to pedigree  
279 information across all breeding designs; (ii) the genetic evaluation of phenotyped cows with  
280 genomic information and modelling herd as a random effect had higher or equal accuracy  
281 compared to modelling herd as a fixed effect; (iii) the genetic evaluation of phenotyped cows  
282 from breeding designs with strong genetic connectedness had higher accuracy compared to  
283 breeding designs with weaker genetic connectedness; (iv) the genomic prediction of young  
284 bulls was possible using marker estimates from the genetic evaluations of their phenotyped  
285 dams. For example, the accuracy of young bulls from an average herd size of 1 ( $\mu=1.58$ ) was  
286 0.40 under a breeding design with 1,000 sires mated per generation and a training set of 8,000  
287 phenotyped and genotyped cows. The accuracies of genomic prediction of young bulls  
288 followed similar trends to those observed in the evaluation of phenotyped cows, with a  
289 reduction of  $\sim 0.1$  in overall accuracy.

290           To ease the presentation, we break the results into 5 sections: (i) LMIC design; (ii)  
291 impact of herd effect modelling; (iii) impact of genetic connectedness and heritability; (iv)  
292 impact of training set size; and (v) prediction of young bulls.

### 293 **LMIC Design**

294           The accuracy of genetic evaluation of phenotyped cows, from small, weakly genetically  
295 connected herds was quantified under the LMIC design. Genetic evaluation with phenotyped  
296 cows from intermediate and large average herd sizes had a higher accuracy than genetic

297 evaluation with phenotyped cows from small average herd sizes. Increases in average herd size  
298 had a diminishing effect on increases in accuracy of genetic evaluation of phenotyped cows.  
299 The genetic evaluation of phenotyped cows using genomic information had higher accuracy  
300 compared to pedigree information across all breeding designs. Table 1 reports the accuracy of  
301 EBVs of phenotyped cows with both genetic evaluation methods as average herd size was  
302 changed. The accuracies reported correspond to models with the herd modelled as a random  
303 effect. At an average herd size of 1 ( $\mu=1.58$ ), phenotyped cows had an accuracy of EBVs of  
304 0.40 with the PBLUP and 0.50 with the GBLUP (an increase of 0.10). At all other average herd  
305 sizes, the increase in accuracy of GBLUP compared to PBLUP was between 0.11 and 0.12. In  
306 what follows, results will only be presented for the GBLUP.

307 **Table 1. The impact of genetic evaluation method on EBV accuracy**

| <i>Method</i> | <i>Size of Herd</i> |          |          |          |           |           |      |
|---------------|---------------------|----------|----------|----------|-----------|-----------|------|
|               | <i>1</i>            | <i>2</i> | <i>4</i> | <i>8</i> | <i>16</i> | <i>32</i> |      |
| <i>PBLUP</i>  | <i>Accuracy</i>     | 0.40     | 0.41     | 0.43     | 0.44      | 0.45      | 0.46 |
| <i>GBLUP</i>  | <i>Accuracy</i>     | 0.50     | 0.53     | 0.54     | 0.56      | 0.57      | 0.57 |

308  
309 *Comparison of the accuracy of genetic evaluation method under the LMIC design with different*  
310 *average herd sizes and using the PBLUP or GBLUP method. Herd is modelled as a random*  
311 *effect. Standard error was 0.01 or less.*  
312

### 313 **Impact of herd effect modelling**

314 Genetic evaluations were run using three models: (i) excluding a herd effect, (ii) herd  
315 modelled as a fixed effect, and (iii) herd modelled as a random effect. The genetic evaluation  
316 of phenotyped cows that included a herd effect had higher accuracies across all breeding  
317 designs. The genetic evaluation of phenotyped cows with genomic information and modelling  
318 herd as a random effect had higher accuracy compared to modelling herd as a fixed effect at

319 low average herd sizes. However, the accuracies of the two modelling approaches converged  
320 once a herd size of 8 was reached. Figure 2 plots the average herd size against the accuracy for  
321 each of the three evaluation models. Figure 2 shows that excluding a herd effect gave an  
322 accuracy of 0.48, averaged across all herd sizes. At average herd sizes of 1.58 and 2.32,  
323 modelling herd as a random effect increased the accuracy by 0.10 and 0.05, compared to  
324 modelling herd as a fixed effect. At an average herd size of 8, the accuracies from the two  
325 modelling approaches had practically converged.

### 326 **Impact of genetic connectedness and trait heritability**

327 In the simulations we varied genetic connectedness between herds in two ways; (i) herd  
328 connectivity – varied by simulating different average herd sizes; and (ii) the recent  $N_e$  of the  
329 breeding design - varied using different numbers of sires mated per generation. The genetic  
330 evaluation of phenotyped cows from breeding designs with strong genetic connectedness had  
331 higher accuracy compared to breeding designs with weaker genetic connectedness. Figure 3  
332 plots the average herd size against the accuracy of EBVs of phenotyped cows for each of the  
333 four breeding designs with different numbers of sires mated per generation. Figure 3 shows  
334 that at an average herd size of 1 ( $\mu=1.58$ ), a decrease in the number of sires mated per  
335 generation from 5,000 to 1,000, 250 and 100 increased the accuracy from 0.46 to 0.50, 0.55  
336 and 0.62, respectively. This shows the individual impact of the number of sires mated per  
337 generation on the accuracy. With 1,000 sires mated per generation, an increase in the average  
338 herd size from 1.58 to 32, increased the accuracy from 0.50 to 0.58. This shows the individual  
339 impact of the average herd size on the accuracy. An increase in the average herd size from 1.58  
340 to 32, and a decrease in the number of sires mated per generation from 1,000 to 100, increased  
341 the accuracy from 0.50 to 0.68. This shows the combined impact of the genetic connectedness  
342 of the breeding design on the accuracy.



343           The genetic connectedness of the breeding design also showed interactions with the  
344 heritability of the trait. Across all trait heritabilities, the EBVs of phenotyped cows had lower  
345 accuracy in breeding designs that had weak genetic connections. The lower accuracy due to an  
346 increase in the number of sires mated per generation in the breeding design became more  
347 prominent at lower heritabilities. The lower accuracy due to a decrease in the average herd size  
348 of the breeding design was more prominent at higher heritabilities. Figure 4 plots the average  
349 herd size against the accuracy of EBVs of phenotyped cows for two of the four different  
350 numbers of sire mated per generation (100 and 1,000 sires). The three panels correspond to the  
351 heritability under the different breeding designs. Figure 4 shows that the highest accuracy  
352 (0.94) was achieved for a high heritability trait (0.5) and when genetic connectedness was  
353 strong (100 sires mated per generation and an average herd size of 32). A decrease in the  
354 average herd size from 32 to 1.58, reduced the accuracy by 0.07. An accuracy of 0.68 was  
355 achieved for a low heritability trait (0.1) and when genetic connectedness was strong (100 sires  
356 mated per generation and an average herd size of 32). An increase in the number of sires mated  
357 per generation to 1,000 sires mated per generation, reduced the accuracy by 0.10.

### 358 **Impact of Training Set Size**

359           Genetic evaluation of phenotyped cows with a larger number of records had higher  
360 accuracies for all average herd sizes. Figure 5 plots the average herd size against the accuracy  
361 of EBVs of phenotyped cows for the four different training set sizes. Figure 5 shows an increase  
362 in the number of records in the training set increased the accuracy across all of the average  
363 herd sizes. At an average herd size of 1 ( $\mu=1.58$ ), an increase in the number of records in the  
364 training set from 2,000 to 8,000, 16,000 and 32,000 records increased the accuracy from 0.41  
365 to 0.50, 0.59 and 0.68, respectively.

## 366 **Prediction of young bulls**

367 Genomic prediction of young bulls was possible using marker estimates from the  
368 genetic evaluations of their phenotyped dams. The accuracies of young bulls followed similar  
369 trends to those observed in the evaluation of phenotyped cows, with a reduction of ~0.1 in  
370 overall accuracy. Genomic prediction of young bulls with a larger number of records in the  
371 training set had higher accuracies. The accuracy of genomic prediction of young bulls from an  
372 average herd size of 1 ( $\mu=1.58$ ) was 0.40 under a breeding design with 1,000 sires mated per  
373 generation and a training set of 8,000 phenotyped and genotyped cows. Figure 6 plots the  
374 accuracy of EBVs of candidate young bulls against the average herd size for the four different  
375 training set sizes. Figure 6 shows that an increase in the number of records in the training set  
376 increased the accuracy across all of the average herd sizes. At an average herd size of 1  
377 ( $\mu=1.58$ ), an increase in the number of records in the training set from 2,000 to 8,000, 16,000  
378 and 32,000 records increased the accuracy from 0.28 to 0.40, 0.51 and 0.62, respectively.

379 The accuracy was also affected by an interaction between the heritability of the trait  
380 and the genetic connectedness of the breeding design. The genetic connectedness of the  
381 breeding design was less important for traits with a higher heritability. Figure 7 plots the  
382 accuracy against the average herd size for two of the four different numbers of sire mated per  
383 generation (100 and 1,000 sires). The three panels correspond to the different trait heritabilities  
384 in the breeding designs. Figure 7 shows that an increase in the average herd size did not recover  
385 the loss of accuracy due to lower genetic connectedness (100 vs 1,000 sires mated per  
386 generation). This is different from what was observed with the accuracy for phenotyped cows.  
387 Figure 7 shows that for a high heritability trait (0.5) and an average herd size of 32, increasing  
388 the number of sires mated per generation from 100 to 1,000 sires mated per generation reduced  
389 the accuracy of young bulls by 0.04.

## 390 **Discussion**

391           In this paper, we demonstrated that genetic evaluation using genomic information can  
392 provide accurate EBVs when using data recorded on smallholder farms across a range of  
393 breeding designs. Therefore, genetic evaluations using genomic information could enable *in-*  
394 *situ* data recorded on smallholder farms to be used to drive *in-situ* genetic improvement  
395 programs and genetic importation programs to improve animal performance on such  
396 smallholder farms. This capacity would enable tailored improvement and importation of  
397 genetics for smallholder farms. The results of our study highlight three main points for  
398 discussion: (i) factors that impact the accuracy of genomic evaluations; (ii) limitations of the  
399 simulation; and (iii) prospects for animal breeding in LMIC smallholder dairy production  
400 systems.

### 401 **Factors that impact the accuracy of genomic evaluations**

#### 402 *Impact of Herd Size*

403           The herd or management group is usually included in the statistical model of genetic  
404 evaluations to enhance the partitioning of the genetic merit of an individual from the non-  
405 genetic effects underlying its phenotype [21–24]. Herds can be modelled as fixed or random  
406 effects. One of the reasons underlying the great success of genetic evaluations in advanced  
407 economies is that large data sets are routinely assembled from commercial farms with large  
408 herd sizes. This data structure is suited to modelling herd as a fixed effect. This data structure  
409 also enables accurate separation of genetic and environmental effects and reduces potential  
410 bias due to a difference in management effects between different herds.

411           However, LMIC smallholder dairy farms often have small herd sizes, typically between  
412 one and five cows. With herd sizes as small as this, LMIC smallholder dairy datasets sit at one  
413 extreme of the bias-variance trade-off [34]. Modelling herd as a fixed effect provides unbiased

414 estimates. However, when herd sizes are small, these estimates of herd effect may have large  
415 variance. Therefore, modelling herd as a fixed effect in the LMIC smallholder dairy genetic  
416 evaluations may lead to herd effect estimates with high variance and a reduced ability to  
417 correctly rank individuals by genetic merit [25]. This could lead to a decreased accuracy of  
418 EBVs. An alternative approach in such settings would be to model herds as random effects.  
419 Modelling herd as a random effect looks to minimize the variance of estimates, but the resulting  
420 estimates are inherently biased due to shrinkage applied during estimation. However, the  
421 shrinkage process allows phenotypes recorded in small herds to partially and proportionately  
422 contribute to the genetic evaluation. This is essential for LMIC smallholder dairy genetic  
423 evaluations with herd sizes typically between one and five cows. The results from our study  
424 support this and showed that when data is collected from herds between one and four cows,  
425 genomic evaluations modelling herd as a random effect outperformed modelling herd as a fixed  
426 effect. In the case of genomic evaluations using data from an average herd size of 1 ( $\mu=1.58$ ),  
427 modelling herd as a random effect increased the accuracy of EBVs of phenotyped cows by 0.10  
428 compared to modelling herd as a fixed effect. It was only when the average herd size was 8 or  
429 more that the accuracy of EBVs of phenotyped cows from the two models converged. Overall  
430 our results demonstrate that modelling herd as a random effect in LMIC smallholder dairy  
431 genetic evaluations: (i) increases the accuracy of genetic evaluations; (ii) enables phenotypes  
432 recorded in all herds to partially and proportionately contribute to the genetic evaluation; and  
433 (iii) enables the breeding values of all animals (even those in single cow herds) to be calculated.  
434 However, as is discussed later, modelling herd as a random effect may increase accuracy but  
435 bias may be generated when non-random associations between the genetic value of cattle and  
436 the herd management exist within the training set.

437 *Impact of GBLUP as a tool to increase connectedness between herds*

438           Sufficient genetic connectedness between herds is important for accurate genetic  
439 evaluations [16,35]. In dairy production systems in advanced economies, large herd sizes and  
440 widespread use of artificial insemination creates strong genetic connectedness between herds  
441 that enables accurate separation of genetic and environmental effects. Because strong genetic  
442 connectedness between herds is already established in dairy production systems in advanced  
443 economies, GBLUP has primarily increased the accuracy of EBVs compared to PBLUP by  
444 capturing and exploiting deviations from expected relationships between cattle caused by  
445 Mendelian sampling [36–38]. For example, the accuracy, which is the square root of reliability,  
446 of prediction for milk yield of young bulls have increased from 0.62 using pedigree best linear  
447 unbiased predictions (PBLUP) to 0.85 for genomic best linear unbiased predictions (GBLUP)  
448 [20]. We say “primarily” because most training populations are comprised of bulls that were  
449 progeny tested across a large number of herds. In this situation, modelling both the genetic and  
450 herd effects jointly is less of a concern. The single-step GBLUP method and the recent rise of  
451 cow genotyping will also enable improvements by jointly modelling of genetic and herd  
452 effects. In LMIC smallholder dairy production systems the benefit using GBLUP will be both  
453 due to exploiting deviations from expected relationships caused by Mendelian sampling and  
454 due to implicit increases of genetic connectedness between herds.

455           Generating sufficient genetic connectedness between herds is especially difficult and  
456 important in LMIC smallholder dairy production systems because herd sizes are often small,  
457 farms are geographically dispersed, and artificial insemination is not widely used [8]. In such  
458 production systems, the genetic and environmental effects are likely to be partially or fully  
459 confounded. This is most obvious in the case of a single cow herd where we cannot separate  
460 the genetic effect of the cow from the herd effect of the farm. However, a range of levels of  
461 confounding could also arise in small herds composed of cows sharing the same pedigree-

462 derived relatedness, with the recent common ancestor or ancestors only used in that herd. In  
463 both of these circumstances, PBLUP has limited ability to partition a cow's phenotype into its  
464 genetic and environmental components. In contrast, GBLUP can achieve this partitioning,  
465 because it is capable of tracking the different permutations of haplotypes shared between cattle  
466 in different herds. During a genetic evaluation, GBLUP implicitly estimates the effects of these  
467 haplotypes and from this also the EBV of each animal. This allows phenotypic records from  
468 cows with shared haplotypes in different herds to contribute to the implicit estimation of  
469 haplotype effects and the estimates of those haplotype effects allows the partitioning of those  
470 cow's phenotypes into their genetic and herd environment components. Furthermore, through  
471 this implicit increasing of genetic connectedness between herds, GBLUP increases the number  
472 of herds and cows that contribute useable information to the genetic evaluation compared to  
473 PBLUP. All of these interlinked factors that underlie the advantages of GBLUP, firstly make  
474 genetic evaluations using data recorded *in-situ* on smallholder herds possible, and secondly,  
475 work to make those genetic evaluations more accurate than those of PBLUP. In our study, the  
476 increase in genetic connectedness provided by GBLUP resulted in genetic evaluations with  
477 approximately 0.1 higher accuracy of EBVs compared to PBLUP, independent of herd size.  
478 This result probably overestimates the power of PBLUP in such settings. We used five  
479 generations of error-free pedigree records in PBLUP. In reality, limited pedigree recording  
480 takes place in LMIC smallholder dairy production systems. We should emphasise though that  
481 LMIC smallholder dairy data structures likely do not enable very accurate estimation of  
482 individual haplotype effects and that the dataset size will continue to be an important factor.

483 Another benefit of the increased genetic connectedness of training sets provided by  
484 GBLUP, not assessed in our study, may be the mitigation of the bias of EBVs. In LMIC  
485 smallholder dairy production systems, natural sire mating is prevalent, pedigree recording is  
486 limited, herd sizes are often small and farms are geographically dispersed. This structure is

487 likely to lead to isolated family clusters in pedigrees. Therefore, when using PBLUP in LMIC  
488 smallholder dairy genetic evaluations, most of the information used to calculate the EBV for  
489 any particular individual will be provided by close relatives captured by this poorly connected  
490 pedigree. This may result in only a very small number of herds contributing effective  
491 information to the genetic evaluation of an animal or group of related animals. This becomes a  
492 problem if confounding exists between the environment and the genetics in the isolated clusters  
493 of herds. Confounding can occur when the same natural service bull is used by a cohort of  
494 farmers with farms that have a better or worse than average herd environment. This may lead  
495 to biased breeding values under PBLUP. In contrast, haplotypes are likely to be dispersed  
496 across more herds. Therefore, GBLUP could accumulate effective information from more  
497 herds and more cows and thus be less prone to having haplotypes confounded with the  
498 environment.

#### 499 **Limitations of the simulation**

500 Our simulations did not model the full complexity that would arise in practical genetic  
501 evaluations for LMIC smallholder dairy production systems. In this section we discuss three  
502 limitations of our simulations: (i) high genomic selection accuracy; (ii) a simplified distribution  
503 of animals across farms; and (iii) a simplified breeding goal.

#### 504 *Impact of high genomic selection accuracy*

505 The accuracies of EBVs of phenotyped cows and young bulls observed in these  
506 simulations are likely higher than what may be expected in practical genetic evaluations for  
507 LMIC smallholder dairy production systems. Several simplifications of the simulation are  
508 likely to have caused this, including the absence of genotyping and pedigree errors, additive  
509 genetic architecture, homogeneity of environment and a single breed. Also, fixed variance  
510 components were used in the estimation of EBVs. In practical LMIC genetic evaluations, the

511 estimation error of variance components may result in lower accuracies of EBVs. However,  
512 we believe that the main conclusion from this study (i.e., that GBLUP is more powerful than  
513 PBLUP in LMIC smallholder production systems for several reasons) would still hold for more  
514 realistic simulations or real data. For decades it has been difficult to sustain widespread  
515 recording and use of pedigree to drive genetic evaluations in LMIC dairy production systems.  
516 GBLUP, for the reasons we outline, offers a route to overcoming this problem.

### 517 *Impact of simplified distribution of animals across farms*

518         The distribution of cattle across herds in the population impacts the choice of modelling  
519 herd as a fixed or random effect in genetic evaluations. Bias, detected in this study as an  
520 inflation or deflation of EBVs, can be generated when a non-random association between herd  
521 management and genetic potential of cattle exists. Such non-random associations can be  
522 generated, for example, by well-resourced farmers who use better management practices also  
523 being able to afford semen of higher genetic merit sires, or by the restriction of natural mating  
524 sires to herds in specific regions. As discussed previously, modelling herd as a fixed effect  
525 estimates the herd effects independently for each herd. When herd sizes are large, such as in  
526 advanced economies, this can reduce bias caused by differences in the genetic means of  
527 different herds. Herd sizes are not large in LMIC smallholder dairy production systems. In such  
528 circumstances, modelling herd as a random effect in genetic evaluations allows phenotypes  
529 recorded in small herds to partially and proportionately contribute to the genetic evaluation.  
530 This benefit extends to small herds composed of cows of varying relatedness, with the ancestral  
531 haplotypes only present in that herd. This is important in an LMIC smallholder dairy  
532 production systems context, with more than 70% of milk in Kenya produced by herds of one  
533 to five cows [6,7]. However, the choice between modelling herd as a random effect should  
534 consider the bias-variance trade-off [34]. This choice is particularly important if correlations  
535 between herd management and the genetic value of cows exist. Under this scenario, if the



536 differences in genetic means across herds are not accounted for, the herd effect of an animal  
537 may be partially assigned to the genetic effect when herd is modelled as a random effect. In  
538 our study, cattle were assigned to herds at random and no correlation between herd  
539 management and the genetic value of cows existed. Therefore, significant bias effects were  
540 only detected in genetic evaluations modelling herd as a fixed effect with an average herd size  
541 of one (results not shown). There is another impact of the simulation not modelling the full  
542 complexity of the distribution of cattle and its genetic effects across farms. The training sets  
543 likely had an increased genetic connectedness compared to practical genetic evaluations in  
544 LMIC smallholder dairy production systems. This resulted in accuracies of EBVs that are likely  
545 to be higher than expected in practical genetic evaluations in LMIC smallholder dairy  
546 production systems. However, our study also did not capture the full complexity of the  
547 interaction between genetic connectedness and herd size. Therefore, our results likely  
548 underestimated the benefits of GBLUP to increase genetic connectedness and more accurately  
549 separate the genetic and environmental components of each cow's phenotype in small herds in  
550 practical genetic evaluations in LMIC smallholder dairy production systems. With the  
551 projected increases in data recording, we expect that these effects will diminish or that the scale  
552 of the data will enable at least reasonably high accuracy to stimulate genetic progress.

### 553 *Impact of simplified breeding goal*

554 The breeding program examined in this simulation only considered a single quantitative  
555 trait that did not interact with the environment. The breeding goal for practical LMIC  
556 smallholder dairy production systems would be much more complex in practice. It would  
557 comprise of several correlated traits (e.g., milk yield, milk components, fertility, feed  
558 requirements, heat tolerance, disease resistance) many of which would interact with the  
559 environment. The single quantitative trait with 10,000 QTL that we simulated is representative  
560 of such an index with a few additional assumptions: all traits are measured on all animals, all

561 traits are pleiotropic, and economic merit is linear. This study simulated a simplified genetic  
562 architecture without considering dominance, epistasis and gene by environment interaction.  
563 This will likely decrease the absolute values of accuracy reported in this study but the main  
564 conclusions of our study (i.e., that GBLUP is more powerful than PBLUP in LMIC smallholder  
565 dairy production systems for several reasons) will still hold.

## 566 **Prospects for animal breeding in LMICs**

567 Our motivations for undertaking this study were to contribute to the enabling of the  
568 sustained and long-term use of animal breeding to improve agricultural productivity and  
569 sustainability in LMIC smallholder dairy production systems. Breeding has been hugely  
570 successful for improving animals and plants in advanced economies and for improving plants  
571 in LMICs. Breeding has had limited success in improving animals in LMICs. We believe that  
572 for animal breeding to be successful in LMIC smallholder dairy production systems it must be  
573 driven by data recorded *in-situ* on animals from such farms. We believe that the limited success  
574 of animal breeding in these contexts is due to the infrastructure and data structures that are  
575 prevalent in these systems, which make genetic evaluation using pedigree difficult, if not  
576 impossible. Specifically, the infrastructure required to record pedigree over long periods of  
577 time is typically absent in LMIC smallholder dairy production systems. The lack of widespread  
578 use of AI and the small herd sizes result in a data structure that has insufficient genetic  
579 connectedness between herds to facilitate genetic evaluations based on pedigree. We believe  
580 that genomic data offers a route to overcome these problems and the results of our study show  
581 this. However, our study did not quantify the long-term impacts of genomic data in LMIC  
582 smallholder dairy breeding programs. As an example, our study demonstrated that the EBVs  
583 of young bulls from an average herd size of 1 ( $\mu=1.58$ ) could be predicted with an accuracy of  
584 0.40. However, as well as increasing the accuracy of selection, genomic evaluations also offer  
585 an opportunity to reduce the generation interval of breeding programs. These reductions in the

586 generation interval have been the primary driver of the gain in the rate of genetic improvement  
587 in dairy breeding programs in advanced economies because they have approximately halved  
588 the generation interval, thereby doubling the rate of genetic gain [20]. In LMIC breeding  
589 programs, it is difficult to estimate the reductions in the generation interval that genomic  
590 evaluations could provide. This is due to the lack of pedigree recording and infrastructure for  
591 the widespread use of AI, already discussed. However, it is possible to say that genomic  
592 evaluations will allow LMIC breeding programs to drive the generation interval to near the  
593 biological and economic minimum for that system. The impact of this, and the other results  
594 from our study, on the long-term genetic gain of LMIC smallholder dairy breeding programs  
595 will need to be explored further.

596 Genomic data is expensive and its requirement may create a new cost barrier to the  
597 success of animal breeding in LMIC smallholder dairy production systems. New business  
598 models are needed to overcome this barrier in a self-sustaining way. One such model could  
599 involve establishing an intertwined breeding and dissemination program for a target  
600 environment. The cost of operating the breeding program would need to be proportionate to  
601 the market that it would serve via its dissemination program. The breeding program could  
602 comprise an informal set of nucleus animals distributed across many small herds within the  
603 target environment. These nucleus animals could be genotyped and phenotyped and this data  
604 used for a genetic evaluation using GBLUP. The best animals from this nucleus could be  
605 disseminated via artificial insemination (with or without a subsequent progeny testing scheme),  
606 as natural service sires, or as heifers. Further, the genomic prediction equation calculated for  
607 the genetic evaluation could be used to select any external animals that would be imported into  
608 the region. To reduce the costs of data recording in the nucleus and to increase the value of  
609 what would be disseminated a whole range of additional technologies and services could be  
610 bundled together. For example, nucleus herds could also serve as demonstration herds and the

611 dissemination program could provide additional extension services (e.g., a text message for a  
612 small fee with management or market information). Or improved animal genetics could be  
613 packaged together with other technology (e.g., improved seeds) which may have higher  
614 adoption rates. Overall, a business model could be constructed that bundles technology, data  
615 recording, extension services, and a marketplace for LMIC smallholder farmers. This type of  
616 self-sustaining platform would maximize the benefits and cost-efficiency of any component  
617 (e.g., the genotyping and phenotyping of animals). This business model could leverage the  
618 successes of established technologies and practices to drive adoption of those that have been  
619 traditionally more intractable. The Africa Dairy Genetic Gains [14], the Public Private  
620 Partnership for AI Dissemination [15] projects and the emerging social enterprises (e.g., One  
621 Acre Fund [39], and electronic marketplaces for agricultural products in LMICs (e.g.,  
622 Livestock 247 [40]) show that many components of such a model are already in place.

## 623 **Conclusions**

624           This study has demonstrated the potential of genomic information to be an enabling  
625 technology in LMIC smallholder dairy production systems by facilitating genetic evaluations  
626 with *in-situ* records collected from farms with herd sizes of four cows or less. Across a range  
627 of breeding designs, genomic data made it possible to accurately predict EBVs of phenotyped  
628 cows and young bulls using data sets that contained small herds that had weak genetic  
629 connections. The use of *in-situ* smallholder dairy data in genetic evaluations would establish  
630 breeding programs to improve *in-situ* germplasm and, if required, would enable the importation  
631 of the most suitable external germplasm. This could be individually tailored for each target  
632 environment. Together this would increase the productivity, profitability and sustainability of  
633 LMIC smallholder dairy systems. However, genomic data is expensive and business models  
634 will need to be carefully constructed so that the costs are sustainably offset.

635

636

637

638

639

640

641

642 **Declarations**

643 **Ethics approval and consent to participate**

644 Not applicable.

645 **Consent for publication**

646 Not applicable.

647 **Availability of data and material**

648 The simulated data and materials are available upon request.

649 **Competing interests**

650 The authors declare that they have no competing interests

651 **Funding**

652 The authors acknowledge the financial support from the BBSRC ISPG to The Roslin Institute  
653 (BBS/E/D/30002275), and the Centre for Tropical Livestock Genetics and Health (CTLGH)  
654 dairy Genetics Program.

655  
656 **Author's contributions**

657 JMH conceived the study. JMH and OP designed the study. OP performed the analysis. OP  
658 and JMH wrote the manuscript. RM, RCG, MJ and GG helped interpret the result and refined  
659 the manuscript. All authors read and approved the final manuscript.

660 **Acknowledgements**

661 The authors thank Georgios Banos for valuable comments on a previous draft of the paper.

662 This work has made use of the resources provided by the Edinburgh Compute and Data Facility

663 (ECDF) (<http://www.ecdf.ed.ac.uk>).

664

## 665 **References**

- 666 [1] Dekkers J, Hospital F. The use of molecular genetics in the improvement of agricultural  
667 populations. *Nat Rev Genet* 2002;162:1945–59. doi:10.1038/nrg701.
- 668 [2] Kahi AK, Nitter G, Gall CF. Developing breeding schemes for pasture based dairy  
669 production systems in Kenya: II. Evaluation of alternative objectives and schemes using  
670 a two-tier open nucleus and young bull system. *Livest Prod Sci* 2004;88:179–92.  
671 doi:10.1016/j.livprodsci.2003.07.015.
- 672 [3] Muriuki HG. Dairy development in kenya. *Food Agric Organ United Nations* 2011:1–  
673 52.
- 674 [4] Ojango JMK, Wasike CB, Enahoro DK, Okeyo AM. Dairy production systems and the  
675 adoption of genetic and breeding technologies in Tanzania, Kenya, India and Nicaragua.  
676 *Anim Genet Resour* 2016;59:81–95. doi:10.1017/S2078633616000096.
- 677 [5] FAOSTAT. FAOSTAT 2018. <http://www.fao.org/faostat/> (accessed November 1,  
678 2018).
- 679 [6] East African Dairy Development Program. *The Dairy Value Chain in Kenya*  
680 2012:2011–2.
- 681 [7] Abdulsamad A, Gereffi G. East Africa dairy value chains: Firm capabilities to expand  
682 regional trade. 2016.
- 683 [8] Ojango JMK, Marete A, Mujibi D, Rao J, Pool J, Rege JEO, et al. A novel use of high  
684 density SNP assays to optimize choice of different crossbred dairy cattle genotypes in  
685 small-holder systems in East Africa. *Proc 10th World Congr Genet Appl to Livest Prod*  
686 2014:2–4. doi:10.13140/2.1.3730.5603.



- 687 [9] Mutavi SK, Kanui TI, Njarui DM, Musimba NR, Amwata DA. Innovativeness and  
688 Adaptations : The Way forward for Small scale Peri- Urban Dairy Farmers in Semi-Arid  
689 Regions of South Eastern Kenya 2016;3:1–14.
- 690 [10] Ducrocq V, Laloe D, Swaminathan M, Rognon X, Tixier-Boichard M, Zerjal T.  
691 Genomics for ruminants in developing countries: From principles to practice. *Front*  
692 *Genet* 2018;9:1–7. doi:10.3389/fgene.2018.00251.
- 693 [11] Rothschild MF, Plastow GS. Applications of genomics to improve livestock in the  
694 developing world. *Livest Sci* 2014;166:76–83. doi:10.1016/j.livsci.2014.03.020.
- 695 [12] Potdar V, Bhave K, Khadse J. BAIF Experience in Field Data Collection International  
696 *Journal of Animal* 2017:3–7.
- 697 [13] Wurzinger M, Sölkner J, Iñiguez L. Important aspects and limitations in considering  
698 community-based breeding programs for low-input smallholder livestock systems.  
699 *Small Rumin Res* 2011;98:170–5. doi:10.1016/j.smallrumres.2011.03.035.
- 700 [14] ADGG. Africa Dairy Genetic Gains (ADGG) n.d. <https://africadgg.wordpress.com/>.
- 701 [15] PAID. Public Private Partnership n.d. [https://www.slideshare.net/ILRI/adgg-paid2-](https://www.slideshare.net/ILRI/adgg-paid2-feb2017)  
702 [feb2017](https://www.slideshare.net/ILRI/adgg-paid2-feb2017) (accessed August 14, 2019).
- 703 [16] Kennedy BW, Trus D. Considerations on genetic connectedness between management  
704 units under an animal model. *J Anim Sci* 1993;71:2341–52.  
705 doi:10.2527/1993.7192341x.
- 706 [17] Mrode R, Ojango JMK, Okeyo AM, Mwacharo JM. Genomic Selection and Use of  
707 Molecular Tools in Breeding Programs for Indigenous and Crossbred Cattle in  
708 Developing Countries: Current Status and Future Prospects. *Front Genet* 2019;9.

- 709 doi:10.3389/fgene.2018.00694.
- 710 [18] Nejati-Javaremi a., Smith C, Gibson JP. Effect of total Allelic Relationship on Accuracy  
711 of Evaluation and Response to Selection. *J Anim Sci* 1997;75:1738–45.  
712 doi:10.1111/j.1540-5834.2011.00603.x.
- 713 [19] Villanueva B, Pong-Wong R, Fernandez J, Toro MA. Benefits from marker-assisted  
714 selection under an additive. *J Anim Sci* 2005;83:1747–52.
- 715 [20] Wiggans GR, Cole JB, Hubbard SM, Sonstegard TS. Genomic Selection in Dairy Cattle:  
716 The USDA Experience. *Annu Rev Anim Biosci* 2017;5:309–27. doi:10.1146/annurev-  
717 animal-021815-111422.
- 718 [21] Schaeffer LR. Contemporary Groups Are Always Random. Personal 2009.  
719 <http://www.aps.uoguelph.ca/~lrs/LRSsite/ranfix.pdf> (accessed August 14, 2019).
- 720 [22] Visscher MP., Goddard ME. Fixed and Random Contemporary Groups. *J Dairy Sci*  
721 1993;76:1444–54.
- 722 [23] Ugarte E, Alenda R, Carabaño MJ. Fixed or Random Contemporary Groups in Genetic  
723 Evaluations. *J Dairy Sci* 1992;75:269–78. doi:10.3168/jds.S0022-0302(92)77762-5.
- 724 [24] Frey M, Hofer A, Künzi N. Comparison of models with a fixed or a random  
725 contemporary group effect for the genetic evaluation for litter size in pigs. *Livest Prod*  
726 *Sci* 1997;48:135–41.
- 727 [25] Oikawa T, Sato K. Treating small herds as fixed or random in an animal model. *J Anim*  
728 *Breed Genet* 1997;114:177–83. doi:10.1111/j.1439-0388.1997.tb00503.x.
- 729 [26] Gaynor RC, Gorjanc G, Wilson D, Money D, Hickey JM. AlphaSimR 2019.

- 730 [27] Chen GK, Marjoram P, Wall JD. Fast and flexible simulation of DNA sequence data.  
731 Genome Res 2009;19:136–42. doi:10.1101/gr.083634.108.
- 732 [28] MacLeod IM, Larkin DM, Lewin HA, Hayes BJ, Goddard ME. Inferring demography  
733 from runs of homozygosity in whole-genome sequence, with correction for sequence  
734 errors. Mol Biol Evol 2013;30:2209–23. doi:10.1093/molbev/mst125.
- 735 [29] Gibson J, Ojango J, Okeyo M. Dairy Genetics East Africa (DGEA) Phase 2 - The final  
736 narrative report to the Bill and Melinda Gates Foundation. 2014.
- 737 [30] Henderson CR. Best Linear Unbiased Estimation and Prediction under a Selection  
738 Model. Biometrics 1975;31:423–47.
- 739 [31] VanRaden PM. Efficient Methods to Compute Genomic Predictions. J Dairy Sci  
740 2008;91:4414–23. doi:10.3168/jds.2007-0980.
- 741 [32] Meyer K. WOMBAT – A tool for mixed model analyses in quantitative genetics by  
742 REML. J Zhejiang Uni Sci B 2007;8:15–21. doi:[doi:10.1631/jzus.2007.B0815].
- 743 [33] Hickey JM, Gorjanc G. AlphaBayes n.d.
- 744 [34] Stanek EJ, Well A, Ockene I. Why not routinely use best linear unbiased predictors  
745 (BLUPs) as estimates of cholesterol, per cent fat from kcal and physical activity? Stat  
746 Med 1999;18:2943–59. doi:10.1002/(SICI)1097-0258(19991115)18:21<2943::AID-  
747 SIM241>3.0.CO;2-0.
- 748 [35] Foulley JL, Bouix J, Goffinet B, Elsen JM. Connectedness in Genetic Evaluation. In:  
749 Gianola D, Hammond K, editors. Adv. Stat. Methods Genet. Improv. Livest., Berlin,  
750 Heidelberg: Springer Berlin Heidelberg; 1990, p. 277–308. doi:10.1007/978-3-642-  
751 74487-7\_13.

752 [36] Hayes BJ, Visscher PM, Goddard ME. Increased accuracy of artificial selection by using  
753 the realized relationship matrix. *Genet Res (Camb)* 2009;91:47–60.  
754 doi:10.1017/S0016672308009981.

755 [37] VanRaden PM, Van Tassell CP, Wiggans GR, Sonstegard TS, Schnabel RD, Taylor JF,  
756 et al. Invited Review: Reliability of genomic predictions for North American Holstein  
757 bulls. *J Dairy Sci* 2009;92:16–24. doi:10.3168/jds.2008-1514.

758 [38] Su G, Guldbrandtsen B, Gregersen VR, Lund MS. Preliminary investigation on  
759 reliability of genomic estimated breeding values in the Danish Holstein population. *J*  
760 *Dairy Sci* 2010;93:1175–83. doi:10.3168/jds.2009-2192.

761 [39] One Acre Fund n.d. <https://oneacrefund.org/> (accessed August 14, 2019).

762 [40] Livestock 247 n.d. <https://livestock247.com/> (accessed August 14, 2019).

763

764

765

766

767

768

769

770

771

772 **Figures**

## Simulation Scenarios

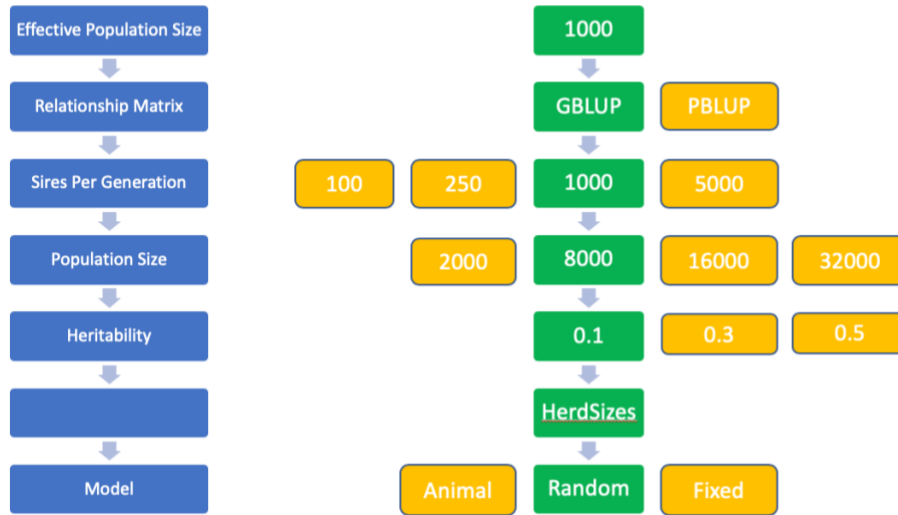

773

774 *Figure 1. Simulation scenarios. The conventional breeding design is highlighted in green. Breeding*  
 775 *designs were compared for each design parameter individually (horizontally), while keeping all other*  
 776 *design parameters fixed at the values of the conventional breeding design.*

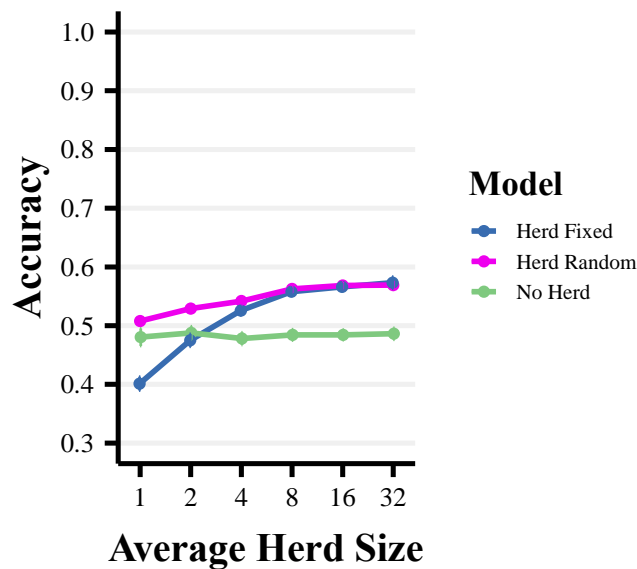

777

778 *Figure 2. The impact of the model on EBV accuracy of cows. Comparison of the statistical modelling*  
 779 *of herd under the LMIC design with GBLUP. The accuracy of estimated breeding values as a function*  
 780 *of average herd size (1-32) and the herd effect (i) excluded from the model ([Symbol]), (ii) modelled*  
 781 *as a fixed effect ([Symbol]) and (iii) modelled as a random effect.*

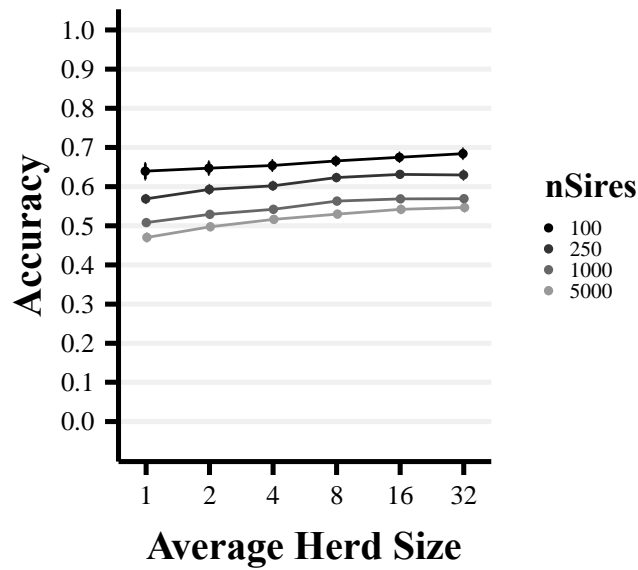

782

783 *Figure 3. The impact of genetic connectedness on EBV accuracy of cows. Comparison of genetic*  
784 *connectedness of the training set with GBLUP. The accuracy of estimated breeding*  
785 *values are presented as a function of average herd size (1-32) and the number of sires (100, 250, 1000*  
786 *& 5000). The number of records in the training set is 8000. Herd is modelled as a random effect.*

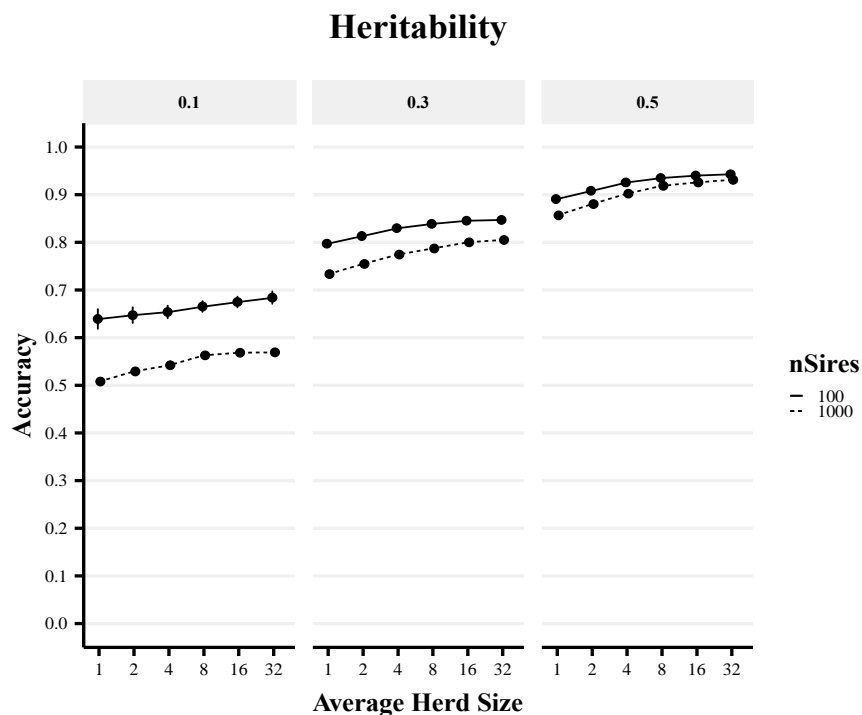

787

788 *Figure 4. The impact of genetic connectedness and heritability on EBV accuracy of cows.*  
789 *Comparison of the heritability of the trait and genetic connectedness with GBLUP. The accuracy of*  
790 *estimated breeding values as a function of average herd size (1-32) and the genetic connectedness of*

791 the training set (100 & 1,000 sires per generation). The three panels correspond to the heritability of  
792 the trait (0.1, 0.3 & 0.5). Herd is modelled as a random effect.

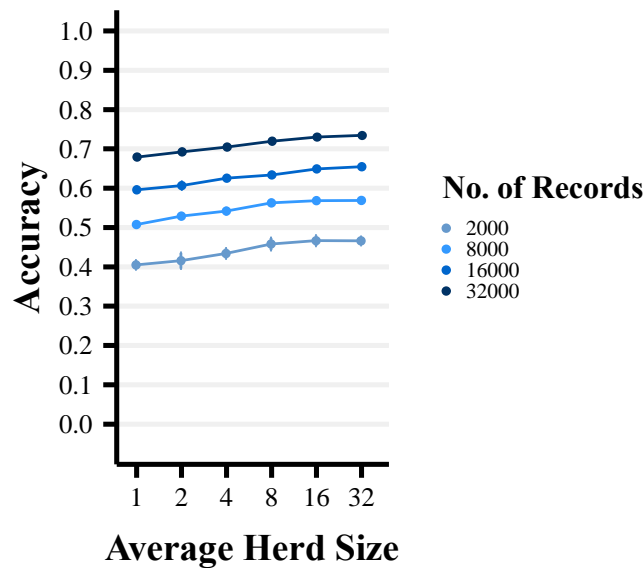

793

794 *Figure 5. The impact of training set size on EBV accuracy of cows. Comparison of the number of*  
795 *records in the training set with GBLUP. The accuracy of estimated breeding values of cows as a*  
796 *function of average herd size (1-32) and the number of records in the training set (2000, 8000, 16000*  
797 *& 32000). Herd is modelled as a random effect.*

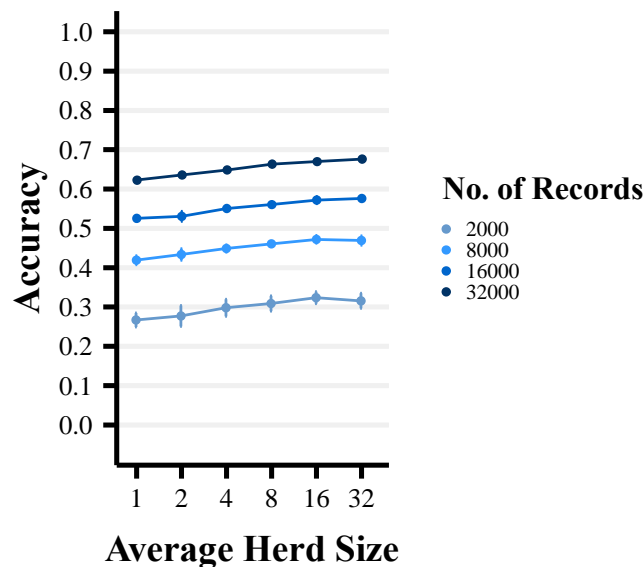

798

799 *Figure 6. The impact of training set size on EBV accuracy of young bulls. Comparison of the number*  
800 *of records in the training set and genetic connectedness with GBLUP. The accuracy of genomic*  
801 *estimated breeding values of young bulls as a function of average herd size (1-32) and the number of*  
802 *records in the training set (2000, 8000, 16000 & 32000). Herd is modelled as a random effect.*

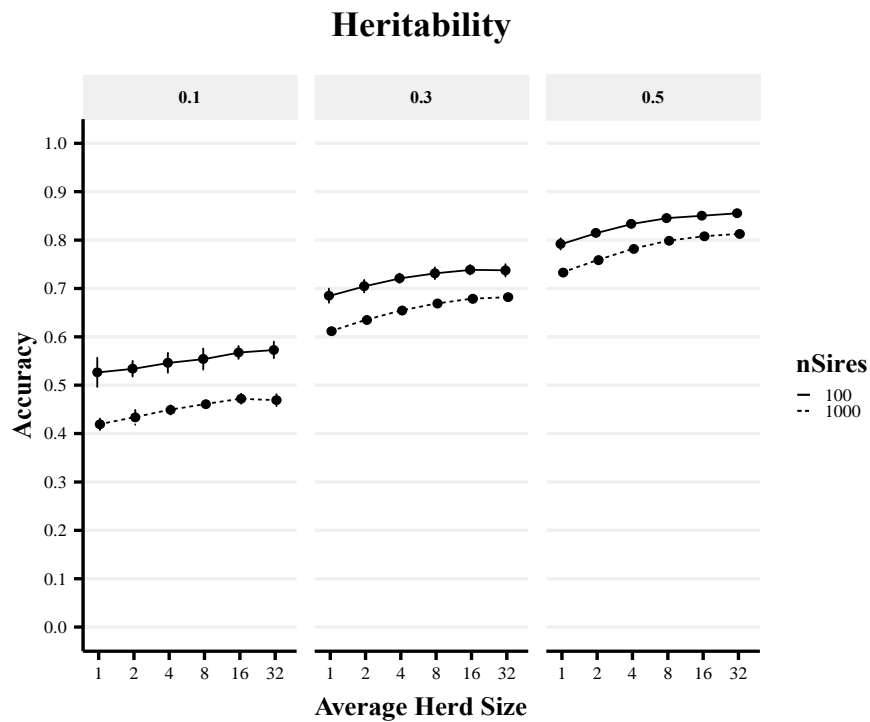

803

804 *Figure 7. The impact of genetic connectedness and heritability on EBV accuracy of young bulls.*

805 *Comparison of the heritability of the trait with GBLUP. The accuracy of genomic estimated breeding*

806 *values of young as a function of average herd size (1-32) and the genetic connectedness of the*

807 *training set (100 & 1,000 sires per generation). The three panels correspond to the heritability of the*

808 *trait (0.1, 0.3 & 0.5). Herd is modelled as a random effect.*

809
